# Supplementary material for: Efficient process for conversion of fructose to 5-hydroxymethylfurfural with ionic liquids
Source: Royal Society of Chemistry journal article supplement (doi:10.1039/b905975j), 2009-01-01
Supplement: b905975j.pdf [file b905975j.pdf]

## Supplementary Information

### Efficient process for conversion of fructose to 5-hydroxymethylfurfural with ionic liquids

Xinhua Qi<sup>\*ab</sup>, Masaru Watanabe<sup>a</sup>, Taku M. Aida<sup>a</sup> and Richard L. Smith, Jr.<sup>a\*</sup>

<sup>a</sup>Research Center of Supercritical Fluid Technology, Tohoku University, 6-6-11 Aoba, Aramaki, Aoba-ku, Sendai 980-8579, Japan.

<sup>b</sup>Key Laboratory of Pollution Processes and Environmental Criteria (Ministry of Education), College of Environmental Science and Engineering, Nankai University, Tianjin 300071, China  
Fax: (+81) 022-795-5864; Email: [qixinhua@scf.che.tohoku.ac.jp](mailto:qixinhua@scf.che.tohoku.ac.jp), [smith@scf.che.tohoku.ac.jp](mailto:smith@scf.che.tohoku.ac.jp)

#### Arrhenius plot for the dehydration of fructose in [BMIM]Cl

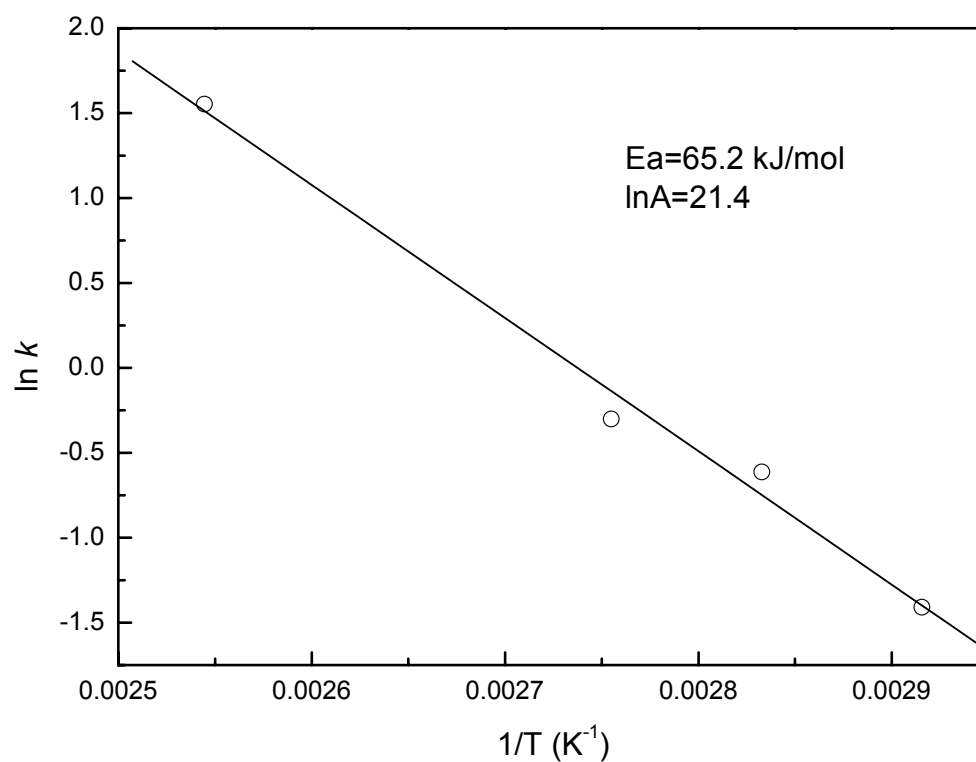

Fig. S1 Arrhenius plot for the dehydration of fructose to 5-HMF in [BMIM]Cl
